# Supplementary material
Source: HighWire-hosted journal article supplement (https://bmjopen.bmj.com/content/13/12/e074993)
Supplement: inline-supplementary-material-1 [file inline-supplementary-material-1.pdf]

**Supplemental Material****Table S1.** Description of coding systems and codes

| Coding System                           | Code                                                                                                                     | Description                                                       |
|-----------------------------------------|--------------------------------------------------------------------------------------------------------------------------|-------------------------------------------------------------------|
| <i>COVID-19 diagnoses and lab tests</i> |                                                                                                                          |                                                                   |
| ICD-10                                  | U07.1, U07.2                                                                                                             | COVID-19 (WHO)                                                    |
| ICD-10                                  | B97.29                                                                                                                   | Other coronavirus as the cause of diseases classified elsewhere   |
| ICD-10                                  | B34.2                                                                                                                    | Coronavirus infection, unspecified                                |
| ICD-10                                  | J12.81                                                                                                                   | Pneumonia due to SARS-associated coronavirus                      |
| LOINC                                   | 94505-5,94506-3,94558-4, 94562-6, 94762-2,94769-7,95209-3                                                                | SARS-CoV-2 (COVID19) [presence] in serum or plasma by immunoassay |
| <i>COVID-19 vaccination</i>             |                                                                                                                          |                                                                   |
| CPT-4                                   | 91300,0001A,0002A,0003A,0004A, 91305,0051A,0052A,0053A,0054A 91307,0071A,0072A,0073A,0074A 91308,0081A,0082A,0083A,0084A | Pfizer-BioNTech                                                   |
| CPT-4                                   | 91301,0011A,0012A,0013A,91306, 0064A,91311,0111A,0112A,0113A, 91309,0091A,0092A,0093A,0094A                              | Moderna                                                           |
| CPT-4                                   | 91302,0021A,0022A                                                                                                        | AstraZeneca                                                       |
| CPT-4                                   | 91303,0031A,0034A                                                                                                        | Janssen                                                           |
| CPT-4                                   | 91304,0041A,0042A                                                                                                        | Novavax                                                           |
| CPT-4                                   | 91310,0104A                                                                                                              | Sanofi Pasteur                                                    |
| <i>Baseline characteristics</i>         |                                                                                                                          |                                                                   |
| ICD-10                                  | I10                                                                                                                      | Essential hypertension                                            |
| ICD-10                                  | E10-E11                                                                                                                  | Diabetes (type I and II)                                          |
| ICD-10                                  | E66                                                                                                                      | Overweight, obesity                                               |
| ICD-10                                  | N18                                                                                                                      | Chronic kidney diseases                                           |
| ICD-10                                  | I50                                                                                                                      | Heart failure                                                     |
| ICD-10                                  | I63                                                                                                                      | Stroke                                                            |
| ICD-10                                  | I20-I25                                                                                                                  | Ischemic heart disease                                            |
| ICD-10                                  | J45                                                                                                                      | Asthma                                                            |
| ICD-10                                  | J44                                                                                                                      | Chronic obstructive pulmonary disease                             |
| ICD-10                                  | F33                                                                                                                      | Depression                                                        |
| ICD-10                                  | F41                                                                                                                      | Anxiety                                                           |
| ICD-10                                  | F31                                                                                                                      | Bipolar disorder                                                  |
| ICD-10                                  | F17                                                                                                                      | Tobacco/nicotine dependence                                       |

*Substance use disorder*

|        |                                                           |                              |
|--------|-----------------------------------------------------------|------------------------------|
| ICD-10 | F10.1, F10.2                                              | Alcohol use disorder         |
| ICD-10 | F11.1, F11.2                                              | Opioid use disorder          |
| ICD-10 | F12.1, F12.2                                              | Cannabis use disorder        |
| ICD-10 | F14.1, F14.2                                              | Cocaine use disorder         |
| ICD-10 | F15.1, F15.2                                              | Stimulant use disorder       |
| ICD-10 | F13.1, F13.2, F16.1, F16.2, F18.1,<br>F18.2, F19.1, F19.2 | Other substance use disorder |

---

**Table S2.** Characteristics of the study population by COVID-19 reinfection outcome

| Characteristics                    | Individuals with COVID-19 Reinfection, n (%) |                     |                               |                   |                          |                   |                         |                   |                  |                   |
|------------------------------------|----------------------------------------------|---------------------|-------------------------------|-------------------|--------------------------|-------------------|-------------------------|-------------------|------------------|-------------------|
|                                    | Reinfection, n (%)                           |                     | Emergency Department (30-day) |                   | Hospitalization (30-day) |                   | Intensive Care (30-day) |                   | Death (30-day)   |                   |
|                                    | Yes<br>(N=872,446)                           | No<br>(N=1,809,987) | Yes<br>(N=163,012)            | No<br>(N=709,434) | Yes<br>(N=45,362)        | No<br>(N=827,084) | Yes<br>(N=12,782)       | No<br>(N=859,664) | Yes<br>(N=5,858) | No<br>(N=866,588) |
| Age at index, mean±SD <sup>†</sup> | 43.8±16.5                                    | 45.3±17.1           | 45.4±18.2                     | 43.4±16           | 53.7±19.1                | 43.2±16.1         | 56.2±17.6               | 43.6±16.4         | 67.5±15.5        | 43.6±16.4         |
| Age                                |                                              |                     |                               |                   |                          |                   |                         |                   |                  |                   |
| 18-39                              | 404,011 (46.3)                               | 764,126 (42.2)      | 72,806 (44.7)                 | 331,205 (46.7)    | 12,693(28)               | 391,318 (47.3)    | 2,584 (20.2)            | 401,427 (46.7)    | 381 (6.5)        | 403,630 (46.6)    |
| 40-64                              | 353,590 (40.5)                               | 762,587 (42.1)      | 61,007 (37.4)                 | 292,583 (41.2)    | 17,504 (38.6)            | 336,086 (40.6)    | 5,573 (43.6)            | 348,017 (40.5)    | 1,753 (29.9)     | 351,837 (40.6)    |
| 65+                                | 114,845 (13.2)                               | 283,274 (15.7)      | 29,199 (17.9)                 | 85,646 (12.1)     | 15,165 (33.4)            | 99,680 (12.1)     | 4,625 (36.2)            | 110,220 (12.8)    | 3,724 (63.6)     | 111,121 (12.8)    |
| Female                             | 517,916 (59.4)                               | 966,370 (53.4)      | 100,293 (61.5)                | 417,623 (58.9)    | 24,690 (54.4)            | 493,226 (59.6)    | 5,997 (46.9)            | 511,919 (59.5)    | 2,699 (46.1)     | 515,217 (59.5)    |
| Hispanic                           | 53,381 (6.1)                                 | 126,502 (7)         | 16,168 (9.9)                  | 37,213 (5.2)      | 5,009 (11)               | 48,372 (5.8)      | 1,255 (9.8)             | 52,126 (6.1)      | 373 (6.4)        | 53,008 (6.1)      |
| Race                               |                                              |                     |                               |                   |                          |                   |                         |                   |                  |                   |
| White                              | 410,391 (47)                                 | 809,554 (44.7)      | 97,110 (59.6)                 | 313,281 (44.2)    | 29,984 (66.1)            | 380,407 (46)      | 8,151 (63.8)            | 402,240 (46.8)    | 3,915 (66.8)     | 406,476 (46.9)    |
| Black                              | 115,406 (13.2)                               | 240,255 (13.3)      | 43,787 (26.9)                 | 71,619 (10.1)     | 10,389 (22.9)            | 105,017 (12.7)    | 3,091 (24.2)            | 112,315 (13.1)    | 1,227 (20.9)     | 114,179 (13.2)    |
| Other                              | 346,649 (39.7)                               | 760,178 (42)        | 22,115 (13.6)                 | 324,534 (45.7)    | 4,989 (11)               | 341,660 (41.3)    | 1,540 (12)              | 345,109 (40.1)    | 716 (12.2)       | 345,933 (39.9)    |
| Hypertension                       | 152,909 (17.5)                               | 255,440 (14.1)      | 51,182 (31.4)                 | 101,727 (14.3)    | 20,779 (45.8)            | 132,130 (16)      | 6,699 (52.4)            | 146,210 (17)      | 3,348 (57.2)     | 149,561 (17.3)    |
| Diabetes                           | 74,105 (8.5)                                 | 128,342 (7.1)       | 27,554 (16.9)                 | 46,551 (6.6)      | 12,533 (27.6)            | 61,572 (7.4)      | 4,377 (34.2)            | 69,728 (8.1)      | 2,195 (37.5)     | 71,910 (8.3)      |
| Obesity/overweight                 | 112,102 (12.8)                               | 166,507 (9.2)       | 35,402 (21.7)                 | 76,700 (10.8)     | 11,726 (25.8)            | 100,376 (12.1)    | 3,421 (26.8)            | 108,681 (12.6)    | 1,469 (25.1)     | 110,633 (12.8)    |
| Chronic kidney disease             | 32,936 (3.8)                                 | 44,435 (2.5)        | 12,979 (8)                    | 19,957 (2.8)      | 7,625 (16.8)             | 25,311 (3.1)      | 2,736 (21.4)            | 30,200 (3.5)      | 1,778 (30.4)     | 31,158 (3.6)      |
| Heart Failure                      | 23,458 (2.7)                                 | 30,654 (1.7)        | 10,966 (6.7)                  | 12,492 (1.8)      | 6,745 (14.9)             | 16,713 (2)        | 2,636 (20.6)            | 20,822 (2.4)      | 1,639 (28)       | 21,819 (2.5)      |
| Stroke                             | 14,214 (1.6)                                 | 19,947 (1.1)        | 5,562 (3.4)                   | 8,652 (1.2)       | 2,766 (6.1)              | 11,448 (1.4)      | 958 (7.5)               | 13,256 (1.5)      | 598 (10.2)       | 13,616 (1.6)      |
| Ischemic Heart Disease             | 43,909 (5)                                   | 65,166 (3.6)        | 17,935 (11)                   | 25,974 (3.7)      | 9,384 (20.7)             | 34,525 (4.2)      | 3,319 (26)              | 40,590 (4.7)      | 1,971 (33.6)     | 41,938 (4.8)      |
| Asthma                             | 69,883 (8)                                   | 90,818 (5)          | 24,551 (15.1)                 | 45,332 (6.4)      | 6,512 (14.4)             | 63,371 (7.7)      | 1,895 (14.8)            | 67,988 (7.9)      | 636 (10.9)       | 69,247 (8)        |
| COPD                               | 22,857 (2.6)                                 | 31,103 (1.7)        | 10,541 (6.5)                  | 12,316 (1.7)      | 5,484 (12.1)             | 17,373 (2.1)      | 2,061 (16.1)            | 20,796 (2.4)      | 1,148 (19.6)     | 21,709 (2.5)      |
| Depression                         | 95,776 (11)                                  | 117,360 (6.5)       | 33,688 (20.7)                 | 62,088 (8.8)      | 11,025 (24.3)            | 84,751 (10.2)     | 3,133 (24.5)            | 92,643 (10.8)     | 1,300 (22.2)     | 94,476 (10.9)     |
| Bipolar                            | 13,976 (1.6)                                 | 15,537 (0.9)        | 7,096 (4.4)                   | 6,880 (1)         | 2,457 (5.4)              | 11,519 (1.4)      | 672 (5.3)               | 13,304 (1.5)      | 217 (3.7)        | 13,759 (1.6)      |
| Anxiety                            | 121,345 (13.9)                               | 154,624 (8.5)       | 37,970 (23.3)                 | 83,375 (11.8)     | 11,359 (25)              | 109,986 (13.3)    | 3,146 (24.6)            | 118,199 (13.7)    | 1,179 (20.1)     | 120,166 (13.9)    |
| Vaccine dose                       |                                              |                     |                               |                   |                          |                   |                         |                   |                  |                   |
| None                               | 818,515 (93.8)                               | 1,719,387 (95)      | 151,116 (92.7)                | 667,399 (94.1)    | 41,355 (91.2)            | 777,160 (94)      | 11,784 (92.2)           | 806,731 (93.8)    | 5,582 (95.3)     | 812,933 (93.8)    |
| One                                | 12,079 (1.4)                                 | 22,997 (1.3)        | 2,805 (1.7)                   | 9,274 (1.3)       | 922 (2)                  | 11,157 (1.3)      | 240 (1.9)               | 11,839 (1.4)      | 63 (1.1)         | 12,016 (1.4)      |

|                        |              |              |               |              |              |              |              |              |            |              |
|------------------------|--------------|--------------|---------------|--------------|--------------|--------------|--------------|--------------|------------|--------------|
| Two or more            | 41,852 (4.8) | 67,603 (3.7) | 9,091 (5.6)   | 32,761 (4.6) | 3,085 (6.8)  | 38,767 (4.7) | 758 (5.9)    | 41,094 (4.8) | 213 (3.6)  | 41,639 (4.8) |
| Smoking                | 59,674 (6.8) | 89,652 (5)   | 26,629 (16.3) | 33,045 (4.7) | 8,580 (18.9) | 51,094 (6.2) | 2,842 (22.2) | 56,832 (6.6) | 898 (15.3) | 58,776 (6.8) |
| Substance use disorder |              |              |               |              |              |              |              |              |            |              |
| Alcohol                | 15,801 (1.8) | 18,422 (1)   | 7,986 (4.9)   | 7,815 (1.1)  | 3,373 (7.4)  | 12,428 (1.5) | 1,200 (9.4)  | 14,601 (1.7) | 392 (6.7)  | 15,409 (1.8) |
| Opioid                 | 7,642 (0.9)  | 7,462 (0.4)  | 4,461 (2.7)   | 3,181 (0.4)  | 1,844 (4.1)  | 5,798 (0.7)  | 587 (4.6)    | 7,055 (0.8)  | 186 (3.2)  | 7,456 (0.9)  |
| Cocaine                | 4,117 (0.5)  | 3,367 (0.2)  | 2,738 (1.7)   | 1,379 (0.2)  | 1,161 (2.6)  | 2,956 (0.4)  | 414 (3.2)    | 3,703 (0.4)  | 96 (1.6)   | 4,021 (0.5)  |
| Stimulant              | 3,922 (0.4)  | 3,921 (0.2)  | 2,593 (1.6)   | 1,329 (0.2)  | 1,094 (2.4)  | 2,828 (0.3)  | 351 (2.7)    | 3,571 (0.4)  | 84 (1.4)   | 3,838 (0.4)  |
| Cannabis               | 6,464 (0.7)  | 6,683 (0.4)  | 3,879 (2.4)   | 2,585 (0.4)  | 1,477 (3.3)  | 4,987 (0.6)  | 461 (3.6)    | 6,003 (0.7)  | 107 (1.8)  | 6,357 (0.7)  |
| Other                  | 13,533 (1.6) | 13,848 (0.8) | 7,256 (4.5)   | 6,277 (0.9)  | 2,651 (5.8)  | 10,882 (1.3) | 897 (7)      | 12,636 (1.5) | 276 (4.7)  | 13,257 (1.5) |

<sup>†</sup>SD: standard deviation

All the differences were statistically significant at the 0.05 level

**Table S3.** Risk of COVID-19 reinfection and outcomes

| Factors                  | Reinfection,<br>aOR (95% CI) | Individuals with COVID-19 Reinfection:<br>Outcomes within 30 days of reinfection |                                  |                                 |                        |
|--------------------------|------------------------------|----------------------------------------------------------------------------------|----------------------------------|---------------------------------|------------------------|
|                          |                              | Emergency<br>Department,<br>aOR (95% CI)                                         | Hospitalization,<br>aOR (95% CI) | Intensive Care,<br>aOR (95% CI) | Death,<br>aOR (95% CI) |
| Intercept                |                              |                                                                                  |                                  |                                 |                        |
| Female                   | 1.11** (1.08,1.15)           | 0.96 (0.91,1.01)                                                                 | 0.85** (0.8,0.91)                | 0.80** (0.72,0.89)              | 0.99 (0.83,1.19)       |
| Age (ref: 18-39 yrs)     |                              |                                                                                  |                                  |                                 |                        |
| 40-64 yrs                | 0.97 (0.94,1.01)             | 0.91** (0.86,0.97)                                                               | 1.20** (1.12,1.30)               | 1.36** (1.20,1.54)              | 2.42** (1.87,3.13)     |
| 65+ yrs                  | 0.88** (0.83,0.94)           | 0.89* (0.82,0.98)                                                                | 1.43** (1.27,1.60)               | 1.38** (1.16,1.66)              | 4.49** (3.31,6.09)     |
| Hispanic                 | 1.46** (1.38,1.56)           | 1.07 (0.98,1.17)                                                                 | 1.21** (1.08,1.36)               | 0.99 (0.83,1.21)                | 0.65* (0.45,0.95)      |
| Race (ref: White)        |                              |                                                                                  |                                  |                                 |                        |
| Black                    | 1.09** (1.05,1.14)           | 1.52** (1.43,1.61)                                                               | 1.11** (1.03,1.20)               | 1.08 (0.95,1.22)                | 0.86 (0.69,1.06)       |
| Other                    | 0.71** (0.67,0.74)           | 1.42** (1.31,1.54)                                                               | 0.93 (0.84,1.04)                 | 1.37** (1.17,1.61)              | 1.46** (1.12,1.89)     |
| Hypertension             | 1.10** (1.06,1.15)           | 1.14** (1.07,1.20)                                                               | 1.34** (1.24,1.45)               | 1.44** (1.27,1.62)              | 0.97 (0.78,1.20)       |
| Diabetes                 | 1.07** (1.02,1.12)           | 1.17** (1.09,1.24)                                                               | 1.30** (1.20,1.41)               | 1.64** (1.46,1.85)              | 1.30** (1.07,1.58)     |
| Obesity/overweight       | 1.10** (1.05,1.14)           | 0.94* (0.89,0.99)                                                                | 0.87** (0.81,0.94)               | 0.76** (0.68,0.86)              | 0.85 (0.70,1.03)       |
| Chronic kidney disease   | 1.11** (1.05,1.17)           | 0.93 (0.86,1.01)                                                                 | 1.29** (1.17,1.42)               | 1.34** (1.17,1.54)              | 2.11** (1.72,2.58)     |
| Heart failure            | 1.18 (1.10,1.26)             | 1.25** (1.14,1.38)                                                               | 1.39** (1.25,1.54)               | 1.53** (1.32,1.77)              | 1.84** (1.48,2.29)     |
| Stroke                   | 0.99 (0.93,1.06)             | 0.86** (0.78,0.94)                                                               | 0.98 (0.87,1.10)                 | 1.01 (0.85,1.19)                | 1.43** (1.13,1.81)     |
| Ischemic heart disease   | 1.02 (0.96,1.07)             | 1.27** (1.18,1.38)                                                               | 1.20** (1.10,1.31)               | 1.18* (1.03,1.35)               | 1.28* (1.04,1.58)      |
| Asthma                   | 1.28** (1.23,1.34)           | 1.20** (1.13,1.27)                                                               | 0.98 (0.90,1.06)                 | 0.99 (0.88,1.12)                | 0.86 (0.69,1.07)       |
| COPD                     | 1.20** (1.13,1.27)           | 1.16** (1.06,1.26)                                                               | 1.45** (1.32,1.59)               | 1.63** (1.43,1.87)              | 1.58** (1.29,1.94)     |
| Depression               | 1.20 (1.16,1.24)             | 1.00 (0.95,1.05)                                                                 | 1.04 (0.97,1.12)                 | 0.93 (0.83,1.03)                | 0.93 (0.78,1.12)       |
| Anxiety                  | 1.11** (1.07,1.15)           | 0.95 (0.90,1.00)                                                                 | 1.06 (0.99,1.13)                 | 1.10 (0.98,1.23)                | 0.88 (0.73,1.06)       |
| Bipolar                  | 1.13** (1.07,1.18)           | 1.46** (1.36,1.56)                                                               | 1.25** (1.15,1.36)               | 0.93 (0.80,1.07)                | 0.95 (0.73,1.23)       |
| Smoking                  | 0.96* (0.93,0.99)            | 1.42 (1.35,1.49)                                                                 | 1.29** (1.21,1.38)               | 1.29** (1.16,1.44)              | 1.15 (0.96,1.37)       |
| Vaccine dose (ref: none) |                              |                                                                                  |                                  |                                 |                        |
| 1                        | 0.89* (0.79,0.99)            | 0.94 (0.79,1.11)                                                                 | 0.98 (0.79,1.22)                 | 0.86 (0.60,1.22)                | 0.87 (0.48,1.56)       |
| 2+                       | 1.05 (0.97,1.12)             | 0.72** (0.64,0.80)                                                               | 0.71** (0.61,0.83)               | 0.50** (0.37,0.66)              | 0.50** (0.31,0.80)     |

|                        |                    |                    |                    |                    |                    |
|------------------------|--------------------|--------------------|--------------------|--------------------|--------------------|
| Alcohol use disorder   | 1.26** (1.21,1.30) | 1.41** (1.34,1.49) | 1.77** (1.66,1.89) | 1.86** (1.67,2.07) | 1.76** (1.46,2.12) |
| Opioid use disorder    | 1.29** (1.24,1.34) | 1.56** (1.47,1.65) | 1.69** (1.58,1.82) | 1.49** (1.33,1.67) | 1.61** (1.33,1.96) |
| Cocaine use disorder   | 1.28** (1.21,1.35) | 1.37** (1.27,1.48) | 1.22** (1.12,1.33) | 1.21** (1.06,1.39) | 0.90 (0.70,1.16)   |
| Stimulant use disorder | 1.13** (1.07,1.19) | 1.69** (1.57,1.83) | 1.63** (1.49,1.78) | 1.50** (1.30,1.72) | 1.33* (1.02,1.73)  |
| Cannabis use disorder  | 1.18** (1.13,1.23) | 1.51** (1.42,1.61) | 1.49** (1.38,1.61) | 1.34** (1.18,1.52) | 1.18 (0.94,1.50)   |
| Other use disorder     | 1.22** (1.18,1.26) | 1.26** (1.20,1.33) | 1.07 (1.00,1.14)   | 1.13* (1.02,1.26)  | 1.11 (0.92,1.33)   |

\* $p < 0.05$ ; \*\* $p < 0.01$

aOR: Adjusted odds ratio; 95% CI: 95% confidence intervals
